# Supplementary material for: Post-Translational Regulation and Trafficking of the Granulin-Containing Protease RD21 of Arabidopsis thaliana
Source: PubMed Central journal article supplement (PMC3292552; doi:10.1371/journal.pone.0032422), 2012-03-02
Supplement: pone.0032422.s001.pdf [file pone.0032422.s001.pdf]

## A

>AtRD21 NP\_564497 [*Arabidopsis thaliana*]

MGFLKPTMAILFLAMVAVSSAVDMSIISYDEKHGVSTTGGRRSEAEVMSIYEAWLVKHGKAQSQNSLVEK  
 DRRFEIFKDNLRFVDEHNEKNLSYRLGLTRFADLTNDEYRSKYLGAKMEKKGERRTSLRYEARVGDDEL  
 ESIDWRKKGAVA~~EVKDQGGCGSCWAFSTIGAVEGINQIVTGD~~LITLSEQELVDCDTSYNEGCNGLMDY  
 AF~~EFIIKNGGIDTDKDYPYKGV~~DTCDQIRKNAKVVTIDSYEDVPTYSEESLKKAVAHQPISIAIEAGGRAF  
 QLYDSGIFDGCQTLDHG~~VVA~~VG~~YGTENG~~KDYWIVRNSWGKSWGESGYLRMARNIASSGKCGIAIEP  
 SYPIKNGENPPNPGSPSPPIKPPTQCDSYYTCPE~~SNTCCCLFEY~~GKYCFAWGCCPLEAATCCDDNYSCCP  
 HEYPVCDLDQGTCLLSKN~~SPFS~~VKALKRKPATPFWSQGRKNIA

>NbALP DQ094022 [*Nicotiana benthamiana*]

MSRFSLLLALVVAGGLFAAALAGPATFADENPIRQIVSDGLHELENGILQVVGKTRHALLFARFAHRYGK  
 RYETVVEIKQRFEVFLDNLMIRSHNKKGLSYKLGVNEFTDITWDEFRRDRLGAAQNC~~SATT~~KG~~NL~~KL~~TN~~  
 VVL~~PET~~KDWREAGIVSPVKNQGGKCGSCWTFSTTGALEAAYGQAFGKGISLSEQQLVDCAGAFNFGCNG  
 GLPSQAF~~EYIK~~SNGGLDTEEAYPYTGKMG~~LCKF~~SEN~~VGV~~KVIDSVNITLGAEDELKYAVALVRPVSIAFE  
 VIKGFKQYKSGVYTSTECGNT~~PMDVN~~HAVLAVGYGVENGVPYWLKNSWGADWGDNGYFKMEMGKN  
 MCGIATCASYPVVA

## B

| Band                  | Peptide sequence                  | Origin | Xcorr** | dCn  |
|-----------------------|-----------------------------------|--------|---------|------|
| 3                     | K.AVAHQPISIAIEAGGR.A              | AtRD21 | 5.15    | 0.32 |
|                       | K.CGIAIEPSYPIK.N                  | AtRD21 | 2.52    | 0.20 |
|                       | K.DYWIVR.N                        | AtRD21 | 2.07    | 0.01 |
|                       | K.KAVAHQPISIAIEAGGR.A             | AtRD21 | 5.48    | 0.45 |
|                       | K.NGGIDTDKDYPYK.G                 | AtRD21 | 4.17    | 0.37 |
|                       | K.SWGESGYLR.M                     | AtRD21 | 2.69    | 0.20 |
|                       | K.VVTIDSYEDVPT <u>YSEESL</u> K.K  | AtRD21 | 5.10    | 0.50 |
|                       | K.VVTIDSYEDVPT <u>YSEESL</u> KK.A | AtRD21 | 4.08    | 0.27 |
| 4                     | K.AVAHQPISIAIEAGGR.A              | AtRD21 | 4.55    | 0.39 |
|                       | K.CGIAIEPSYPIK.N                  | AtRD21 | 3.15    | 0.15 |
|                       | K.GVDGTCDQIR.K                    | AtRD21 | 2.65    | 0.13 |
|                       | K.KAVAHQPISIAIEAGGR.A             | AtRD21 | 5.60    | 0.43 |
|                       | K.NGGIDTDKDYPYK.G                 | AtRD21 | 4.08    | 0.15 |
|                       | K.SWGESGYLR.M                     | AtRD21 | 2.85    | 0.09 |
|                       | K.VVTIDSYEDVPT <u>YSEESL</u> K.K  | AtRD21 | 5.52    | 0.50 |
|                       | K.VVTIDSYEDVPT <u>YSEESL</u> KK.A | AtRD21 | 4.86    | 0.36 |
| 5                     | K.AVAHQPISIAIEAGGR.A              | AtRD21 | 4.30    | 0.48 |
|                       | K.CGIAIEPSYPIK.N                  | AtRD21 | 4.28    | 0.24 |
|                       | K.DYWIVR.N                        | AtRD21 | 2.21    | 0.07 |
|                       | K.KAVAHQPISIAIEAGGR.A             | AtRD21 | 5.66    | 0.51 |
|                       | K.NGGIDTDKDYPYK.G                 | AtRD21 | 3.92    | 0.38 |
|                       | K.SWGESGYLR.M                     | AtRD21 | 2.83    | 0.26 |
|                       | K.VVTIDSYEDVPT <u>YSEESL</u> K.K  | AtRD21 | 5.37    | 0.46 |
|                       | K.VVTIDSYEDVPT <u>YSEESL</u> KK.A | AtRD21 | 4.18    | 0.35 |
|                       | K.NM*CGIATCASYPVVA                | NbALP  | 3.51    | 0.42 |
|                       | K.NMCGIATCASYPVVA                 | NbALP  | 3.03    | 0.40 |
|                       | K.SNGGLDTEEAYPYTGK.N              | NbALP  | 4.90    | 0.47 |
|                       | K.YAVALVR.P                       | NbALP  | 2.73    | 0.16 |
| K.YAVALVRPVSIAFEVIK.G | NbALP                             | 5.09   | 0.36    |      |

**Figure S1** Identification of DCG-04 labeled proteases from agroinfiltrated *N. benthamiana*. DCG-04 labeled proteins were purified, digested with trypsin, and analyzed by mass spectrometry. **A**) Sequences of Arabidopsis RD21 and *N. benthamiana* ALP (Hao et al., 2006). The signal peptide and prodomain are indicated in light and dark grey, respectively. The identified tryptic peptides and catalytic residues are underlined and boldface, respectively. **B**) Summary of the identified tryptic peptides, with individual scores. \*, oxidized methionine; \*\*, X correlation value: >1.5 maybe; >2.5 good; >3.5 excellent; >4.5 no doubt. Only tryptic peptides are shown.
