# Supplementary material for: Post-Translational Regulation and Trafficking of the Granulin-Containing Protease RD21 of Arabidopsis thaliana
Source: PubMed Central journal article supplement (PMC3292552; doi:10.1371/journal.pone.0032422), 2012-03-02
Supplement: pone.0032422.s002.pdf [file pone.0032422.s002.pdf]

**Table S1:** Cloning details

| <b>Construct</b> | <b>Forward primer</b> | <b>Reverse primer</b> | <b>Restriction enzymes</b> | <b>Acceptor</b> | <b>Plasmid</b> | <b>Restriction enzymes</b> | <b>Acceptor</b> | <b>Binary plasmid</b> |
|------------------|-----------------------|-----------------------|----------------------------|-----------------|----------------|----------------------------|-----------------|-----------------------|
| RD21 WT          | RD21AF                | F05j                  | NcoI+PstI                  | pRH80           | pRH626         | EcoRI + XbaI               | pRH385          | pRH628                |
| ΔPG              | RD21AF                | F05i                  | NcoI+PstI                  | pRH80           | pRH625         | EcoRI + XbaI               | pRH385          | pRH629                |
| ΔG               | RD21AF                | R135                  | NcoI+PstI                  | pRH626          | pMS5           | EcoRI + XbaI               | pTP5            | pMS17                 |
| 3C3A             | R136                  | R137                  | (Quick Change pRH626)      |                 | pMS10          | EcoRI + XbaI               | pTP5            | pMS23                 |
| C161A            | R121                  | R122                  | (Quick Change pRH626)      |                 | pMS02          | EcoRI + XbaI               | pTP5            | pMS14                 |
| H297A            | R127                  | R128                  | (Quick Change pRH626)      |                 | pMS42          | EcoRI + XbaI               | pTP5            | pMS49                 |
| N317A            | R129                  | R130                  | (Quick Change pRH626)      |                 | pMS3           | EcoRI + XbaI               | pTP5            | pMS15                 |
| N414A            | R133                  | R134                  | (Quick Change pRH626)      |                 | pMS9           | EcoRI + XbaI               | pTP5            | pJW03                 |
| D180N, I182T     | R123                  | R124                  | (Quick Change pRH626)      |                 | pMS4           | EcoRI + XbaI               | pTP5            | pMS48                 |
