# Supplementary material for: Post-Translational Regulation and Trafficking of the Granulin-Containing Protease RD21 of Arabidopsis thaliana
Source: PubMed Central journal article supplement (PMC3292552; doi:10.1371/journal.pone.0032422), 2012-03-02
Supplement: pone.0032422.s003.pdf [file pone.0032422.s003.pdf]

**Table S2:** Primer sequences

| Primer | Sequence (5' to 3')                              |
|--------|--------------------------------------------------|
| RD21AF | ATGCCCATGGGGTTCCTTAAGCCAACGATGGCG                |
| F05j   | CCCCCTGCAGTTAGCTCGAGGCAATGTTCTTTCTGCCTTG         |
| F05i   | CCCCCTGCAGTTAGCTCGAGCTTTCAATCGCGATTCCACATTTTCG   |
| R121   | CAGGGTGGTTGCGGGAGTgcTTGGGCGTTTTCAACCATTGG        |
| R122   | CCAATGGTTGAAAACGCCCAAgcACTCCCGCAACCACCCTG        |
| R123   | CCAGATCGTAACCGGAaACCTAAcAACCTTGTCTGAACAAG        |
| R124   | CTTGTTGAGACAAGGTTgTTAGGTTCCGGTTACGATCTGG         |
| R127   | GGAAGTTGTGGAACACAACACTAGACgcCGGAGTTGTGGCGGTTGG   |
| R128   | CCAACCGCCACAACACTCCGgcGTCTAGTTGTGTTCCACAACCTCC   |
| R129   | GATTACTGGATTGTGAGAgcCTCATGGGGTAAAAGCTGGGGAG      |
| R130   | CTCCCAGCTTTTACCCCATGAGgcTCTCACAATCCAGTAATC       |
| R133   | GCAGCCACTTGCTGTGATGACgcCTATAGTTGCTGCCCTCACGAG    |
| R134   | CTCGTGAGGGCAGCAACTATAGgcGTCATCACAGCAAGTGGCTGC    |
| R135   | CCCCCTGCAGCTATTGGGTTGGAGGCTTGATGGGAGATGG         |
| R136   | CACTTGTCTGAGAGCAACACTgcTgcTgcTCTGTTTGAGTATGGCAAG |
| R137   | CTTGCCATACTCAAACAGAgcAgcAgcAGTGTGCTCTCAGGACAAGTG |
