# Supplementary material for: Post-Translational Regulation and Trafficking of the Granulin-Containing Protease RD21 of Arabidopsis thaliana
Source: PubMed Central journal article supplement (PMC3292552; doi:10.1371/journal.pone.0032422), 2012-03-02
Supplement: pone.0032422.s004.pdf [file pone.0032422.s004.pdf]

**Table S3:** List of binary plasmids used in this work

| <b>Plasmid</b> | <b>Protein</b> | <b>Ref</b>                                    | <b>Reference</b>    |
|----------------|----------------|-----------------------------------------------|---------------------|
| pTP5           | EV             | Empty vector                                  | Shabab et al., 2008 |
| pRH628         | WT             | Wild-type RD21 protein                        | This work           |
| pRH629         | $\Delta$ PG    | Deletion of pro-rich and granulin domains     | This work           |
| pMS17          | $\Delta$ G     | Deletion of granulin domain                   | This work           |
| pMS23          | 3C3A           | Granulin destabilization mutant               | This work           |
| pMS14          | C161A          | Catalytic Cys mutant                          | This work           |
| pMS49          | H297A          | Catalytic His mutant                          | This work           |
| pMS15          | N317A          | Catalytic Asn mutant                          | This work           |
| pJW03          | N414A          | Putative <i>N</i> -glycosylation site removed | This work           |
| pMS48          | D180N/I182T    | Extra <i>N</i> -glycosylation site introduced | This work           |
